# Supplementary material
Source: publisher figshare collection journal article supplement (https://sage.figshare.com/ndownloader/files/17536619)
Supplement: Supplementary file 1 [file 17536619]

## Online supplement 1

### Scoping review: Search strategy

The following databases were searched:

- MEDLINE
- EMBASE
- PsycINFO
- CINAHL
- Social Science Citation Index

Table 1A: *The search terms used and how they were combined*

---

| # ▲ | Searches                                                                                                                                        |
|-----|-------------------------------------------------------------------------------------------------------------------------------------------------|
| 1   | internet/ or blogging/ or social media/                                                                                                         |
| 2   | (internet or online or website? or web-site? or web or digital or blog* or twitter or tweet* or facebook or social media or app or apps).ti,ab. |
| 3   | 1 or 2                                                                                                                                          |
| 4   | ((physician? or doctor? or surgeon? or nurse? or hospital? or healthcare or health care) adj2 rating?).ti,ab.                                   |
| 5   | ((physician? or doctor? or surgeon? or nurse? or hospital? or healthcare or health care) adj2 review?).ti,ab.                                   |
| 6   | ((physician? or doctor? or surgeon? or nurse? or hospital? or healthcare or health care) adj2 feedback).ti,ab.                                  |
| 7   | ((physician? or doctor? or surgeon? or nurse? or hospital? or healthcare or health care) adj2 appraisal?).ti,ab.                                |
| 8   | ((physician? or doctor? or surgeon? or nurse? or hospital? or healthcare or health care) adj2 comment?).ti,ab.                                  |

---

- 
- 9 ((physician? or doctor? or surgeon? or nurse? or hospital? or healthcare or health care) adj2 evaluation?).ti,ab.
- 10 ((physician? or doctor? or surgeon? or nurse? or hospital? or healthcare or health care) adj2 complain\*).ti,ab.
- 11 ((physician? or doctor? or surgeon? or nurse? or hospital? or healthcare or health care) adj2 post\*).ti,ab.
- 12 4 or 5 or 6 or 7 or 8 or 9 or 10 or 11
- 13 3 and 12
- 14 ((patient? or consumer? or user? or client? or stakeholder? or carer? or caregiver? or relative? or family member? or public) adj2 rating?).ti,ab.
- 15 ((patient? or consumer? or user? or client? or stakeholder? or carer? or caregiver? or relative? or family member? or public) adj2 review?).ti,ab.
- 16 ((patient? or consumer? or user? or client? or stakeholder? or carer? or caregiver? or relative? or family member? or public) adj2 feedback).ti,ab.
- 17 ((patient? or consumer? or user? or client? or stakeholder? or carer? or caregiver? or relative? or family member? or public) adj2 comment?).ti,ab.
- 18 ((patient? or consumer? or user? or client? or stakeholder? or carer? or caregiver? or relative? or family member? or public) adj2 (criticis\* or critique\*).ti,ab.
- 19 ((patient? or consumer? or user? or client? or stakeholder? or carer? or caregiver? or relative? or family member? or public) adj2 assess\*).ti,ab.
- 20 ((patient? or consumer? or user? or client? or stakeholder? or carer? or caregiver? or relative? or family member? or public) adj2 evaluation?).ti,ab.
- 21 ((patient? or consumer? or user? or client? or stakeholder? or carer? or caregiver? or relative? or family member? or public) adj2 complain\*).ti,ab.
-

- 
- 22 ((patient? or consumer? or user? or client? or stakeholder? or carer? or caregiver? or relative? or family member? or public) adj2 post\*).ti,ab.
- 23 ((patient? or consumer? or user? or client? or stakeholder? or carer? or caregiver? or relative? or family member? or public) adj2 (impression? or perspective? or perception? or opinion? or attitude? or view? or prefer\* or judg\* or satisf\*)).ti,ab.
- 24 14 or 15 or 16 or 17 or 18 or 19 or 20 or 21 or 22 or 23
- 25 dentists/ or exp nurses/ or exp nursing staff/ or personnel, hospital/ or exp physicians/
- 26 Hospitals/
- 27 (physician? or doctor? or surgeon? or nurse? or hospital?).ti,ab.
- 28 25 or 26 or 27
- 29 3 and 24 and 28
- 30 ((internet or online or website? or web-site? or web or digital or blog\* or twitter or tweet\* or facebook or social media or app or apps) adj2 rating?).ti,ab.
- 31 ((internet or online or website? or web-site? or web or digital or blog\* or twitter or tweet\* or facebook or social media or app or apps) adj2 review?).ti,ab.
- 32 ((internet or online or website? or web-site? or web or digital or blog\* or twitter or tweet\* or facebook or social media or app or apps) adj2 feedback).ti,ab.
- 33 ((internet or online or website? or web-site? or web or digital or blog\* or twitter or tweet\* or facebook or social media or app or apps) adj2 appraisal?).ti,ab.
- 34 ((internet or online or website? or web-site? or web or digital or blog\* or twitter or tweet\* or facebook or social media or app or apps) adj2 comment?).ti,ab.
- 35 ((internet or online or website? or web-site? or web or digital or blog\* or twitter or tweet\* or facebook or social media or app or apps) adj2 evaluation?).ti,ab.
-

- 
- 36 ((internet or online or website? or web-site? or web or digital or blog\* or twitter or tweet\* or facebook or social media or app or apps) adj2 complain\*).ti,ab.
- 37 ((internet or online or website? or web-site? or web or digital or blog\* or twitter or tweet\* or facebook or social media or app or apps) adj2 post\*).ti,ab.
- 38 30 or 31 or 32 or 33 or 34 or 35 or 36 or 37
- 39 28 and 38
- 40 exp Internet/ and Patient Satisfaction/ and exp Physicians/
- 41 exp Internet/ and Patient Satisfaction/ and Professional-Patient Relations/
- 42 exp \*Internet/ and \*Patient Satisfaction/
- 43 ((internet or online or website? or web-site? or web or digital or blog\* or twitter or tweet\* or facebook or social media or app or apps) and (rating? or evaluation? or review? or feedback or appraisal? or comment? or criticis\* or critique\* or assess\* or post\*) and (physician? or doctor? or surgeon? or nurse? or hospital?)).ti.
- 44 ((internet or online or website? or web-site? or web or digital or blog\* or twitter or tweet\* or facebook or social media or app or apps) and (rating? or evaluation? or review? or feedback or appraisal? or comment? or criticis\* or critique\* or assess\* or post\*) and (patient? or consumer? or user? or client? or stakeholder? or carer? or caregiver? or relative? or family member? or public)).ti.
- 45 ((internet or online or website? or web-site? or web or digital or blog\* or twitter or tweet\* or facebook or social media or app or apps) and (impression? or perspective? or perception? or opinion? or attitude? or view? or prefer\* or judg\* or satisf\*) and (patient? or consumer? or user? or client? or stakeholder? or carer? or caregiver? or relative? or family member? or public)).ti.
-

|    |                                                    |
|----|----------------------------------------------------|
| 46 | 13 or 29 or 39 or 40 or 41 or 42 or 43 or 44 or 45 |
| 47 | limit 46 to english language                       |

## Online Supplement 2

### Main characteristics of included studies

| Study by first author   | Aim                                                                                                          | Method                           | Country                |
|-------------------------|--------------------------------------------------------------------------------------------------------------|----------------------------------|------------------------|
| Adams 2011 <sup>1</sup> | To examine comments made on physician review websites from the perspective of reflexivity in modern society. | Qualitative. Discourse analysis. | England, Holland, USA. |

| <b>Study by first author</b>    | <b>Aim</b>                                                                                                                                                                                                                                                                                                                                                     | <b>Method</b>                                                         | <b>Country</b>                                                                    |
|---------------------------------|----------------------------------------------------------------------------------------------------------------------------------------------------------------------------------------------------------------------------------------------------------------------------------------------------------------------------------------------------------------|-----------------------------------------------------------------------|-----------------------------------------------------------------------------------|
| Adams 2013 <sup>2</sup>         | To examine websites where patients rate and evaluate healthcare services as mechanisms for transforming citizens into surveillers of public services in order to generate knowledge about the everyday performance of professionals and institutions.                                                                                                          | Qualitative. Discourse analysis.                                      | Part of a wider study in England, USA and Holland. This paper focuses on Holland. |
| Bardach 2013 <sup>3</sup>       | To compare hospital scores from the most widely used commercial website in the USA to hospital scores from more systematic measures of patient experience (the Hospital Consumer Assessment of Healthcare Providers and Systems; HCAHPS) and outcomes, and to assess what drives variation in the commercial website scores.                                   | Quantitative.                                                         | USA                                                                               |
| Bardach 2015 <sup>4</sup>       | To investigate if online narrative reviews from patients and surrogates reflect domains in the Hospital Consumer Assessment of Healthcare Providers and Systems (HCAHPS) and to describe additional potential domains.                                                                                                                                         | Qualitative. Thematic analysis                                        | USA                                                                               |
| Bidmon 2014 <sup>5</sup>        | To analyze factors influencing the adoption of and willingness to pay for mobile physician-rating apps.                                                                                                                                                                                                                                                        | Quantitative survey and literature review                             | Germany                                                                           |
| Black 2009 <sup>6</sup>         | To evaluate and describe online healthcare provider reviews.                                                                                                                                                                                                                                                                                                   | Quantitative. Multivariate analysis and logistic regression analyses. | USA                                                                               |
| Brody 2010 <sup>7</sup>         | To present a fully automated method to capture what topics health consumers discuss when reviewing their health providers online.                                                                                                                                                                                                                              | Quantitative. Sentiment analysis using Latent Dirichlet Allocation.   | USA                                                                               |
| Brooks 2017 <sup>8</sup>        | To examine the key themes in positive and negative patient feedback on NHS (National Health Service) services in England, and to understand the specific issues within these themes and how they drive positive and negative evaluation.                                                                                                                       | Mixed methods. Machine learning and qualitative analysis              | England                                                                           |
| Brown-Johnson 2014 <sup>9</sup> | To describe and characterize public commenting in the context of a high-profile publication on psychiatric inpatient smoking bans and subsequent news coverage on the topic.                                                                                                                                                                                   | Qualitative. Content analysis.                                        | USA and elsewhere eg UK                                                           |
| Burkle 2015 <sup>10</sup>       | To explore the frequency with which patients visit and leave comments on rating site, identify most commonly visited sites, evaluate the nature of comments written and quantify the influence that positive comments, negative comments and physician medical malpractice history might have on patients' decisions to seek care from a particular physician. | Quantitative survey.                                                  | USA                                                                               |

| <b>Study by first author</b>      | <b>Aim</b>                                                                                                                                                                                                                                                                                                                                                                                                                                                                    | <b>Method</b>                                     | <b>Country</b> |
|-----------------------------------|-------------------------------------------------------------------------------------------------------------------------------------------------------------------------------------------------------------------------------------------------------------------------------------------------------------------------------------------------------------------------------------------------------------------------------------------------------------------------------|---------------------------------------------------|----------------|
| Detz 2013 <sup>11</sup>           | To examine publicly available, Internet-based reviews of adult primary care physicians, specifically written by patients who report long-term relationships with their physicians.                                                                                                                                                                                                                                                                                            | Qualitative content analysis.                     | USA            |
| Ellimoottil 2013 <sup>12</sup>    | To describe the landscape of online reviews of urologists by looking at a sample of ratings and written reviews from popular physician review websites.                                                                                                                                                                                                                                                                                                                       | Mixed methods. .                                  | USA            |
| Emmert & Meier 2013 <sup>13</sup> | To analyze all physician evaluations that were posted on the German online feedback website, jameda, in 2012. To provide descriptive analysis of (1) both physician and patient characteristics, and (2) the number, distribution, and results of the ratings. To assess (3) the impact of physician and patient characteristics on the overall performance measure, and (4) the correlation between the number of ratings per patient/physician and the overall performance. | Quantitative. Descriptive.                        | Germany        |
| Emmert 2012 <sup>14</sup>         | To determine and structure the quantity and type of information about physicians in the outpatient sector provided on German-language physician rating websites.                                                                                                                                                                                                                                                                                                              | Quantitative. Descriptive.                        | Germany        |
| Emmert 2014 <sup>15</sup>         | To explore the concerns of patients who commented on physician care and to address and enhance patient satisfaction.                                                                                                                                                                                                                                                                                                                                                          | Mixed methods.                                    | Germany        |
| Emmert 2015 <sup>16</sup>         | To present a comprehensive analysis of the ratings of dentists on a German physician rating website over a 2-year period.                                                                                                                                                                                                                                                                                                                                                     | Quantitative, correlation.                        | Germany        |
| Emmert 2013 <sup>17</sup>         | To estimate the current level of awareness and use of physician-rating websites in Germany and to determine their impact on physician choice making and the key predictors which are associated with the knowledge and the use of physician-rating websites.                                                                                                                                                                                                                  | Quantitative, cross-sectional survey.             | Germany        |
| Emmert 2016 <sup>18</sup>         | To examine which health care providers use online rating websites and for what purposes, and whether health care providers use online patient ratings to improve patient care.                                                                                                                                                                                                                                                                                                | Quantitative, online-based cross-sectional survey | Germany        |
| Frost 2015 <sup>19</sup>          | To (1) evaluate the prevalence of orthopedic surgeon ratings on physician rating websites in the United States and (2) evaluate factors that may affect ratings, such as sex, practice sector (academic or private), years of practice, and geographic location.                                                                                                                                                                                                              | Quantitative descriptive study                    | USA            |

| <b>Study by first author</b>           | <b>Aim</b>                                                                                                                                                                                                                                                                                                                                                                                                  | <b>Method</b>                                                       | <b>Country</b> |
|----------------------------------------|-------------------------------------------------------------------------------------------------------------------------------------------------------------------------------------------------------------------------------------------------------------------------------------------------------------------------------------------------------------------------------------------------------------|---------------------------------------------------------------------|----------------|
| Galizzi 2012 <sup>20</sup>             | To explore the extent to which doctor rating websites are known and used among a sample of respondents from London. To understand the main predictors of what makes people willing to use doctor rating websites.                                                                                                                                                                                           | Quantitative cross-sectional study                                  | England        |
| Gao 2012 <sup>21</sup>                 | To describe trends in patients' online ratings over time, across specialties, to identify what physician characteristics influence online ratings, and to examine how the value of ratings reflects physician quality.                                                                                                                                                                                      | Quantitative descriptive study.                                     | USA            |
| Gao 2015 <sup>22</sup>                 | To provide one of the first analyses of how online ratings reflect physician quality as perceived by a broader population of patients.                                                                                                                                                                                                                                                                      | Quantitative correlation                                            | USA            |
| Gilbert 2015 <sup>23</sup>             | To assess radiologist representation on rating sites.                                                                                                                                                                                                                                                                                                                                                       | Quantitative descriptive study.                                     | USA            |
| Glover 2015 <sup>24</sup>              | To examine the extent to which hospitals utilize social media and whether user-generated metrics on Facebook® correlate with a Hospital Compare® metric, specifically 30-day all cause unplanned hospital readmission rates.                                                                                                                                                                                | Quantitative. Retrospective cross-sectional study.                  | USA            |
| Grabner-Krauter 2015 <sup>25</sup>     | To explore how certain characteristics of physician reviews affect the evaluation of the review and users' attitudes toward the rated physician.                                                                                                                                                                                                                                                            | Quantitative survey.                                                | Austria        |
| Gray 2015 <sup>26</sup>                | To measure the association between US physician website ratings and traditional quality measures of clinical and patient experience.                                                                                                                                                                                                                                                                        | Quantitative. Regression analyses.                                  | USA            |
| Greaves, Lavery 2014 <sup>27</sup>     | To describe the frequency of tweets sent to hospitals in the English National Health Service and to examine whether they contain information about quality of care. To compare sentiment on Twitter about hospitals with established survey measures of patient experience and standardised mortality rates.                                                                                                | Mixed methods. Qualitative content analysis and sentiment analysis. | England        |
| Greaves, Pape, King 2012 <sup>28</sup> | To describe patterns observed and analyse associations with unsolicited ratings posted on NHS Choices for all acute hospitals in England and conventional measures of patient satisfaction obtained through formal surveys. To compare the strength of associations between NHS Choices ratings and clinical outcomes and associations between patient survey measures of experience and clinical outcomes. | Quantitative. Cross-sectional observational study.                  | England        |
| Greaves, Pape, King 2012 <sup>29</sup> | To examine hospital-level associations between web-based patient ratings on the NHS Choices Website and objective measures of quality.                                                                                                                                                                                                                                                                      | Quantitative. Cross-sectional observational study.                  | England        |



| <b>Study by first author</b>             | <b>Aim</b>                                                                                                                                                                                                                                                                                                                                                                                                                                                             | <b>Method</b>                                                         | <b>Country</b>  |
|------------------------------------------|------------------------------------------------------------------------------------------------------------------------------------------------------------------------------------------------------------------------------------------------------------------------------------------------------------------------------------------------------------------------------------------------------------------------------------------------------------------------|-----------------------------------------------------------------------|-----------------|
| Greaves, Pape, Lee 2012 <sup>30</sup>    | To examine the usage of NHS Choices and associations between web-based patient ratings and conventional measures of patient experience and clinical quality in primary care.                                                                                                                                                                                                                                                                                           | Quantitative. Cross-sectional observational study.                    | England         |
| Greaves, Ramirez-Cano 2013 <sup>31</sup> | To use machine learning to understand patients' unstructured comments about their care.                                                                                                                                                                                                                                                                                                                                                                                | Quantitative. Sentiment analysis.                                     | England         |
| Hanauer 2014 <sup>32</sup>               | To understand, within the context of other types of rating sites, parents' awareness, perceptions, and use of physician-rating sites for choosing primary care physicians for their children.                                                                                                                                                                                                                                                                          | Quantitative. Cross-sectional, nationally representative survey.      | USA             |
| Hanauer 2014 <sup>33</sup>               | To survey a nationally representative sample of the US population about their knowledge and use of online ratings for selecting a physician for themselves.                                                                                                                                                                                                                                                                                                            | Quantitative, experimental 5x2 factorial design.                      | USA             |
| Hao 2015 <sup>34</sup>                   | To examine and describe online doctor reviewing in China.                                                                                                                                                                                                                                                                                                                                                                                                              | Quantitative. Descriptive statistical study.                          | China           |
| Hao 2016 <sup>35</sup>                   | To automatically extract hidden topics from Web-based physician reviews using text-mining techniques to examine what Chinese patients have said about their doctors and whether these topics differ across various specialties.                                                                                                                                                                                                                                        | Quantitative. Descriptive statistics and Latent Dirichlet Allocation. | China           |
| Hawkins 2015 <sup>36</sup>               | To assess the use of Twitter as a supplemental data stream for measuring patient perceived quality of care in US hospitals and compare patient sentiments about hospitals with established quality measures. To provide a current characterisation of US hospitals on Twitter, explore the unsolicited patient experience topics discussed by patients, and determine if Twitter data are associated with quality of care, as compared with other established metrics. | Quantitative. Machine learning approach/ sentiment analysis.          | USA             |
| Hopper 2015 <sup>37</sup>                | To test the usefulness of sentiment analysis and time-to-next-complaint methods in quantifying text-based information located on the internet.                                                                                                                                                                                                                                                                                                                         | Quantitative. Sentiment analysis.                                     | USA             |
| Jans 2015 <sup>38</sup>                  | To find out how many patient ratings are necessary to outweigh an expert opinion's impact on the decision making process.                                                                                                                                                                                                                                                                                                                                              | Quantitative. Experiment.                                             | The Netherlands |
| Johnson 2013 <sup>39</sup>               | To survey physician leaders' about their perceptions of rating systems, measuring performance and the quality of individual doctors.                                                                                                                                                                                                                                                                                                                                   | Quantitative. Survey.                                                 | USA             |

| <b>Study by first author</b> | <b>Aim</b>                                                                                                                                                                                                                  | <b>Method</b>                                                   | <b>Country</b>  |
|------------------------------|-----------------------------------------------------------------------------------------------------------------------------------------------------------------------------------------------------------------------------|-----------------------------------------------------------------|-----------------|
| Kadry 2011 <sup>40</sup>     | To (1) determine the most frequently visited physician-rating websites with user-generated content, (2) evaluate the available information on these websites, and (3) analyze 4999 individual online ratings of physicians. | Quantitative, descriptive evaluation.                           | USA             |
| Kanouse 2016 <sup>41</sup>   | To examine the effects of providing patient comments along with standardized performance information in a web-based public report.                                                                                          | Quantitative. Experimental design.                              | USA             |
| Kilaru 2015 <sup>42</sup>    | To characterise the content of online reviews and explore their perspectives on US emergency department (ED) care.                                                                                                          | Qualitative. Modified grounded theory.                          | USA             |
| Kinast 2014 <sup>43</sup>    | To identify the reasons why patients write positive and negative online reviews of ophthalmologists.                                                                                                                        | Quantitative. Logistic regression.                              | USA             |
| Kleefstra 2016 <sup>44</sup> | To explore whether and how patient reviews of hospitals, as reported on rating sites, have the potential to contribute to health care inspector's daily supervision of hospital care.                                       | Qualitative. Semistructured interviews; inductively analysed.   | The Netherlands |
| Lagu 2010 <sup>45</sup>      | To describe the structure and content of physician-rating websites and to assess the extent to which a patient might find them valuable.                                                                                    | Quantitative descriptive study.                                 | USA             |
| Lagu 2013 <sup>46</sup>      | To better understand the content of narrative feedback and determine how it might complement other forms of publicly reported quality data, like patient experience data collected by the HCAHPS                            | Mixed methods                                                   | England and USA |
| Lagu 2016 <sup>47</sup>      | To determine if it is feasible to use social media platforms for learning about and improving hospital quality.                                                                                                             | Mixed methods.                                                  | USA             |
| Lewis 2015 <sup>48</sup>     | To characterize the online presence of plastic surgeons in Southern California as portrayed by physician rating websites.                                                                                                   | Quantitative descriptive study.                                 | USA             |
| Li 2015 <sup>49</sup>        | To examine how the proportion and position of negative reviews on such websites influences readers' willingness to choose the reviewed physician.                                                                           | Quantitative. Experimental 5x2 factorial design. Questionnaire. | USA             |
| Lopez 2012 <sup>50</sup>     | To explore the content of Internet reviews about primary care physicians.                                                                                                                                                   | Qualitative. Content analysis.                                  | USA             |
| MacDonald 2015 <sup>51</sup> | To determine how the public views dental care in Quebec.                                                                                                                                                                    | Mixed methods.                                                  | Canada          |
| McCaughey 2014 <sup>52</sup> | To examine the relationship of social media channel utilization by health care organizations and the brand rating of those organizations, as measured by patients who have completed the HCAHPS survey.                     | Quantitative descriptive study.                                 | USA             |

| <b>Study by first author</b>        | <b>Aim</b>                                                                                                                                                                                                                                                                           | <b>Method</b>                              | <b>Country</b>                           |
|-------------------------------------|--------------------------------------------------------------------------------------------------------------------------------------------------------------------------------------------------------------------------------------------------------------------------------------|--------------------------------------------|------------------------------------------|
| Merrell 2013 <sup>53</sup>          | To help physicians and allied health professionals explore the vast array of feedback websites to identify promising websites, and to enhance their practices.                                                                                                                       | Quantitative. Descriptive study            | USA                                      |
| Nakhasi 2016 <sup>54</sup>          | To explore whether Twitter is a relevant data source to learn about patient safety and capture the patient's voice.                                                                                                                                                                  | Qualitative content analysis               | USA (Tweets most likely to be from USA.) |
| Patel 2015 <sup>55</sup>            | To explore and describe general practitioners' attitudes toward online patient feedback, specifically their concerns.                                                                                                                                                                | Qualitative, descriptive.                  | England                                  |
| Patel 2016 <sup>56</sup>            | To explore patients' views toward giving Web-based feedback and ratings to general practitioners (GPs), within the context of other feedback methods available in primary care in England, and in particular, paper-based feedback cards.                                            | Qualitative. Thematic analysis.            | England                                  |
| Paul 2013 <sup>57</sup>             | To propose a joint probabilistic model that captures both the sentiment and aspects latent in the free text of online provider reviews. To elucidate the factors that most affect consumer sentiment regarding interactions with their doctor.                                       | Quantitative. Sentiment analysis.          | USA                                      |
| Ranard 2016 <sup>58</sup>           | To compare the content of all Yelp narrative reviews of hospitals to domains of the HCAHPS survey. To identify which Yelp topics best correlated with positive or negative Yelp review ratings and to correlate Yelp ratings with the HCAHPS survey overall ratings.                 | Quantitative. Latent Dirichlet Allocation  | USA                                      |
| Rastegar-Mojarad 2015 <sup>59</sup> | To create a corpus of patient experience (COPE) and report descriptive statistics to characterize COPE.                                                                                                                                                                              | Quantitative. Natural Language Processing. | USA                                      |
| Reimann 2010 <sup>60</sup>          | To examine the extent to which PRSs currently represent the constructs of patient experience and satisfaction as measured by research instruments.                                                                                                                                   | Mixed methods.                             | Germany and USA                          |
| Riemer 2016 <sup>61</sup>           | To investigate patterns of ratings of dermatologists on commonly used feedback websites to better understand the information available to patients online.                                                                                                                           | Quantitative. Exploratory study.           | USA                                      |
| Rothenfluh 2016 <sup>62</sup>       | To explore the extent to which consumer decision-making based on Web-based reviews is the same for consumer services (ie, choice of a hotel) and health services (ie, choice of a pediatrician), while providing an in-depth understanding of potential differences or similarities. | Qualitative. Thematic analysis.            | Switzerland                              |
| Samora 2016 <sup>63</sup>           | To understand the ethical and professional implications of physician behavior changes secondary to online physician-rating Web sites.                                                                                                                                                | Quantitative. Survey.                      | USA                                      |

| <b>Study by first author</b>   | <b>Aim</b>                                                                                                                                                                                                                                                                                                     | <b>Method</b>                    | <b>Country</b>  |
|--------------------------------|----------------------------------------------------------------------------------------------------------------------------------------------------------------------------------------------------------------------------------------------------------------------------------------------------------------|----------------------------------|-----------------|
| Segal 2012 <sup>64</sup>       | To determine if surgeon volume, as a proxy for clinical outcomes and patient safety, correlates with online reputation.                                                                                                                                                                                        | Quantitative. Descriptive study. | USA             |
| Shepherd 2015 <sup>65</sup>    | To ascertain how social media users with experience of mental disorder relate to each other and the social space during internet based interactions and to uncover the potential role of resources such as Twitter for the provision of feedback on and engagement with mental health service user experience. | Qualitative. Content analysis    | UK              |
| Smith 2016 <sup>66</sup>       | To identify qualitative themes associated with patient reviews of dermatologic care on consumer reporting websites.                                                                                                                                                                                            | Mixed methods.                   | USA             |
| Sobin 2014 <sup>67</sup>       | To evaluate patterns in online ratings of otolaryngologists.                                                                                                                                                                                                                                                   | Quantitative. .                  | USA             |
| Speed 2016 <sup>68</sup>       | To examine the ways in which anonymity and its attendant risks and dangers are conceptualised on different sides of the NHS/community relationship.                                                                                                                                                            | Qualitative thematic analysis    | UK              |
| Sundstrom 2016 <sup>69</sup>   | To examine the role of health as a connective narrative among individuals organizing collectively in an online community. The "We are the 99 percent" Tumblr blog emerged as a spontaneous community platform of the Occupy Wall Street movement in the US.                                                    | Qualitative content analysis.    | USA             |
| Terlutter 2014 <sup>70</sup>   | To analyse patients' knowledge and use of online feedback websites; describe users and nonusers in terms of sociodemographic variables, psychographic variables, and health status; and assert whether these variables can also serve as predictors of usage and nonusage.                                     | Quantitative. Survey.            | Germany         |
| Thackeray 2013 <sup>71</sup>   | To establish the frequency of various forms (eg, spectators, creators, or critics) of online health-seeking behaviors.                                                                                                                                                                                         | Quantitative. Telephone survey.  | USA             |
| Timian 2013 <sup>72</sup>      | To ascertain if Facebook "Likes" are associated with hospital quality and patient satisfaction.                                                                                                                                                                                                                | Quantitative. Exploratory.       | USA             |
| Trehan 2016 <sup>73</sup>      | To evaluate factors associated with positive online patient ratings and written comments regarding hand surgeons.                                                                                                                                                                                              | Quantitative. Exploratory study. | USA             |
| van de Belt 2015 <sup>74</sup> | To identify the added value of social media for two types of supervision by the Dutch Healthcare Inspectorate (DHI), the regulatory body charged with supervising the quality and safety of health care services in the Netherlands.                                                                           | Mixed methods. Exploratory study | The Netherlands |

| <b>Study by first author</b>     | <b>Aim</b>                                                                                                                                                                                                             | <b>Method</b>                                                                     | <b>Country</b> |
|----------------------------------|------------------------------------------------------------------------------------------------------------------------------------------------------------------------------------------------------------------------|-----------------------------------------------------------------------------------|----------------|
| Wallace 2014 <sup>75</sup>       | To demonstrate how the proposed state-of-the-art probabilistic model, that jointly captures latent aspects and sentiment, can leverage a small amount of data annotated by experts to guide topic/sentiment discovery. | Quantitative. Probabilistic model based on factorial Latent Dirichlet Allocation. | USA            |
| van Velthoven 2018 <sup>76</sup> | To identify the self-reported behaviour of the public in reading and writing online feedback in relation to health services.                                                                                           | Quantitative. Face-to-face cross sectional survey                                 | UK             |
| Yaraghi 2018 <sup>77</sup>       | To measure the relative importance of Web-based quality ratings from governmental and commercial agencies on individuals' choice of primary care physicians                                                            | Choice-based experiment                                                           | USA            |
| Zhang 2018 <sup>78</sup>         | To analyse negative online reviews about physicians; to identify potential ways to improve patient satisfaction and patient-doctor relationships                                                                       | Content analysis                                                                  | China          |

## References

1. Adams SA. Sourcing the crowd for health services improvement: The reflexive patient and "share-your-experience" websites. *Social Science & Medicine* 2011; 72: 1069-1076.
2. Adams S. Post-panoptic surveillance through healthcare rating sites: Who's watching whom? *Information, Communication & Society* 2013; 16: 215-235.
3. Bardach NS, Asteria-Penaloza R, Boscardin WJ, et al. The relationship between commercial website ratings and traditional hospital performance measures in the USA. *BMJ Quality & Safety* 2013; 22: 194-202. Comparative Study Research Support, N.I.H., Extramural Research Support, Non-U.S. Gov't.
4. Bardach NS, Hibbard JH, Greaves F, et al. Sources of traffic and visitors' preferences regarding online public reports of quality: web analytics and online survey results. *J Med Internet Res* 2015; 17: e102.
5. Bidmon S, Terlutter R and Rottl J. What explains usage of mobile physician-rating apps? Results from a web-based questionnaire. *Journal of Medical Internet Research* 2014; 16: e148.
6. Black EW, Thompson LA, Saliba H, et al. An analysis of healthcare providers' online ratings. *Informatics in Primary Care* 2009; 17: 249-253.
7. Brody S and Elhadad N. An unsupervised aspect-sentiment model for online reviews. *Human Language Technologies: The 2010 Annual Conference of the North American Chapter of the Association for Computational Linguistics*. Los Angeles, California: Association for Computational Linguistics, 2010, p. 804-812.
8. Brookes G and Baker P. What does patient feedback reveal about the NHS? A mixed methods study of comments posted to the NHS Choices online service. *BMJ Open* 2017; 7. DOI: 10.1136/bmjopen-2016-013821.
9. Brown-Johnson CG, Sanders-Jackson A and Prochaska JJ. Online comments on smoking bans in psychiatric hospitals units. *Journal of Dual Diagnosis* 2014; 10: 204-211. Research Support, N.I.H., Extramural Research Support, Non-U.S. Gov't.
10. Burkle CM and Keegan MT. Popularity of internet physician rating sites and their apparent influence on patients' choices of physicians. *BMC Health Services Research* 2015; 15: 416. Research Support, Non-U.S. Gov't.
11. Detz A, Lopez A and Sarkar U. Long-term doctor-patient relationships: patient perspective from online reviews. *J Med Internet Res* 2013; 15: e131. Research Support, U.S. Gov't, P.H.S.
12. Ellimoottil C, Hart A, Greco K, et al. Online reviews of 500 urologists. *Journal of Urology* 2013; 189: 2269-2273.
13. Emmert M and Meier F. An analysis of online evaluations on a physician rating website: evidence from a German public reporting instrument. *J Med Internet Res* 2013; 15: e157.
14. Emmert M, Sander U, Esslinger AS, et al. Public reporting in Germany: the content of physician rating websites. *Methods of Information in Medicine* 2012; 51: 112-120. Evaluation Studies.
15. Emmert M, Meier F, Heider A-K, et al. What do patients say about their physicians? an analysis of 3000 narrative comments posted on a German physician rating website. *Health Policy* 2014; 118: 66-73.
16. Emmert M, Halling F and Meier F. Evaluations of dentists on a German physician rating Website: an analysis of the ratings. *J Med Internet Res* 2015; 17: e15.
17. Emmert M, Meier F, Pisch F, et al. Physician choice making and characteristics associated with using physician-rating websites: cross-sectional study. *J Med Internet Res* 2013; 15: e187. Research Support, Non-U.S. Gov't.
18. Emmert M, Meszmer N and Sander U. Do Health Care Providers Use Online Patient Ratings to Improve the Quality of Care? Results From an Online-Based Cross-Sectional Study. *J Med Internet Res* 2016; 18: e254. Original Paper 19.09.2016. DOI: 10.2196/jmir.5889.
19. Frost C and Mesfin A. Online reviews of orthopedic surgeons: an emerging trend. *Orthopedics* 2015; 38: e257-262.

20. Galizzi MM, Miraldo M, Stavropoulou C, et al. Who is more likely to use doctor-rating websites, and why? A cross-sectional study in London. *BMJ Open* 2012; 2.
21. Gao GG, McCullough JS, Agarwal R, et al. A changing landscape of physician quality reporting: analysis of patients' online ratings of their physicians over a 5-year period. *Journal of Medical Internet Research* 2012; 14: e38.
22. Gao GD, Greenwood BN, Agarwal R, et al. VOCAL MINORITY AND SILENT MAJORITY: HOW DO ONLINE RATINGS REFLECT POPULATION PERCEPTIONS OF QUALITY. *Mis Quarterly* 2015; 39: 565-+.
23. Gilbert K, Hawkins CM, Hughes DR, et al. Physician rating websites: do radiologists have an online presence? *Journal of the American College of Radiology* 2015; 12: 867-871.
24. Glover M, Khalilzadeh O, Choy G, et al. Hospital Evaluations by Social Media: A Comparative Analysis of Facebook Ratings among Performance Outliers. *Journal of General Internal Medicine* 2015; 30: 1440-1446.
25. Grabner-Krauter S and Waiguny MK. Insights into the impact of online physician reviews on patients' decision making: randomized experiment. *J Med Internet Res* 2015; 17: e93.
26. Gray BM, Vandergrift JL, Gao GG, et al. Website ratings of physicians and their quality of care. *JAMA Internal Medicine* 2015; 175: 291-293. Research Support, Non-U.S. Gov't Research Support, U.S. Gov't, Non-P.H.S.
27. Greaves F, Laverty A, Ramirez-Cano D, et al. Analysis of patients' comments about hospitals in the English NHS via Twitter, and comparison with patient surveys. *BMJ Quality & Safety* 2014; 23. DOI: 10.1136/bmjqs-2014-002893.5.
28. Greaves F, Pape UJ, King D, et al. Associations between Web-based patient ratings and objective measures of hospital quality. *Archives of Internal Medicine* 2012; 172: 435-436. Letter Research Support, U.S. Gov't, Non-P.H.S.
29. Greaves F, Pape UJ, King D, et al. Associations between Internet-based patient ratings and conventional surveys of patient experience in the English NHS: an observational study. *BMJ Quality & Safety* 2012; 21: 600-605. Comparative Study Research Support, Non-U.S. Gov't.
30. Greaves F, Pape UJ, Lee H, et al. Patients' ratings of family physician practices on the internet: usage and associations with conventional measures of quality in the English National Health Service. *Journal of Medical Internet Research* 2012; 14: e146. Research Support, Non-U.S. Gov't.
31. Greaves F, Ramirez-Cano D, Millett C, et al. Use of sentiment analysis for capturing patient experience from free-text comments posted online. *Journal of Medical Internet Research* 2013; 15: e239. Research Support, Non-U.S. Gov't.
32. Hanauer DA, Zheng K, Singer DC, et al. Parental awareness and use of online physician rating sites. *Pediatrics* 2014; 134: e966-975. Randomized Controlled Trial Research Support, Non-U.S. Gov't.
33. Hanauer DA, Zheng K, Singer DC, et al. Public awareness, perception, and use of online physician rating sites. *JAMA* 2014; 311: 734-735. Research Support, Non-U.S. Gov't.
34. Hao H. The development of online doctor reviews in China: an analysis of the largest online doctor review website in China. *Journal of Medical Internet Research* 2015; 17: e134.
35. Hao H and Zhang K. The Voice of Chinese Health Consumers: A Text Mining Approach to Web-Based Physician Reviews. *J Med Internet Res* 2016; 18: e108. Original Paper 10.05.2016. DOI: 10.2196/jmir.4430.
36. Hawkins JB, Brownstein JS, Tuli G, et al. Measuring patient-perceived quality of care in US hospitals using Twitter. *BMJ Quality & Safety* 2015. DOI: 10.1136/bmjqs-2015-004309.
37. Hopper AM and Uriyo M. Using sentiment analysis to review patient satisfaction data located on the internet. *Journal of Health Organization & Management* 2015; 29: 221-233.
38. Jans LCH and Kranzbuhler A-M. The influence of rating volume in the effects of expert versus patient online ratings. *Acta Orthopaedica Belgica* 2015; 81: 662-667.

39. Johnson C. Survey finds physicians very wary of doctor ratings. *Physician Executive* 2013; 39: 6-8.
40. Kadry B, Chu LF, Kadry B, et al. Analysis of 4999 online physician ratings indicates that most patients give physicians a favorable rating. *Journal of Medical Internet Research* 2011; 13: e95.
41. Kanouse DE, Schlesinger M, Shaller D, et al. How Patient Comments Affect Consumers' Use of Physician Performance Measures. *Medical Care* 2016; 54: 24-31.
42. Kilaru AS, Meisel ZF, Paciotti B, et al. What do patients say about emergency departments in online reviews? A qualitative study. *BMJ Quality & Safety* 2016; 25: 14-24.
43. Kinast RM, Barker GT, Day SH, et al. Factors related to online patient satisfaction with ophthalmologists. *Ophthalmology* 2014; 121: 1843-1845.e1841.
44. Kleefstra SM, Zandbelt LC, Borghans I, et al. Investigating the Potential Contribution of Patient Rating Sites to Hospital Supervision: Exploratory Results From an Interview Study in the Netherlands. *J Med Internet Res* 2016; 18: e201. Original Paper 20.07.2016. DOI: 10.2196/jmir.5552.
45. Lagu T, Hannon NS, Rothberg MB, et al. Patients' evaluations of health care providers in the era of social networking: an analysis of physician-rating websites. *Journal of General Internal Medicine* 2010; 25: 942-946.
46. Lagu T, Goff SL, Hannon NS, et al. A mixed-methods analysis of patient reviews of hospital care in England: implications for public reporting of health care quality data in the United States. *Joint Commission Journal on Quality & Patient Safety* 2013; 39: 7-15.
47. Lagu T, Goff SL, Craft B, et al. Can social media be used as a hospital quality improvement tool? *Journal of Hospital Medicine* 2016; 11: 52-55.
48. Lewis P, Kobayashi E and Gupta S. An online review of plastic surgeons in southern california. *Annals of Plastic Surgery* 2015; 74 Suppl 1: S66-70.
49. Li S, Feng B, Chen M, et al. Physician review websites: effects of the proportion and position of negative reviews on readers' willingness to choose the doctor. *Journal of Health Communication* 2015; 20: 453-461.
50. Lopez A, Detz A, Ratanawongsa N, et al. What patients say about their doctors online: a qualitative content analysis. *Journal of General Internal Medicine* 2012; 27: 685-692. Research Support, N.I.H., Extramural Research Support, U.S. Gov't, P.H.S.
51. Macdonald ME, Beaudin A and Pineda C. What do patients think about dental services in Quebec? Analysis of a dentist rating website. *Journal (Canadian Dental Association)* 2015; 81: f3. Research Support, Non-U.S. Gov't.
52. McCaughey D, Baumgardner C, Gaudes A, et al. Best Practices in Social Media: Utilizing a Value Matrix to Assess Social Media's Impact on Health Care. *Social Science Computer Review* 2014; 32: 575-589. DOI: 10.1177/0894439314525332.
53. Merrell JG, Levy BH, 3rd and Johnson DA. Patient assessments and online ratings of quality care: a "wake-up call" for providers. *American Journal of Gastroenterology* 2013; 108: 1676-1685.
54. Nakhasi A, Shen AX, Passarella RJ, et al. Online social networks that connect users to physical activity partners: a review and descriptive analysis. *Journal of Medical Internet Research* 2014; 16: e153.
55. Patel S, Cain R, Neailey K, et al. General Practitioners' Concerns About Online Patient Feedback: Findings From a Descriptive Exploratory Qualitative Study in England. *J Med Internet Res* 2015; 17: e276. Research Support, Non-U.S. Gov't.
56. Patel S, Cain R, Neailey K, et al. Exploring Patients' Views Toward Giving Web-Based Feedback and Ratings to General Practitioners in England: A Qualitative Descriptive Study. *J Med Internet Res* 2016; 18: e217. Original Paper 05.08.2016. DOI: 10.2196/jmir.5865.
57. Paul MJ WB, Dredze M. What affects patient (dis)satisfaction? Analysing online doctor ratings with a joint topic-sentiment model. *Papers from the AAAI 2013 Workshop* 2013: 53-58.
58. Ranard BL, Werner RM, Antanavicius T, et al. Yelp Reviews Of Hospital Care Can Supplement And Inform Traditional Surveys Of The Patient Experience Of Care. *Health Affairs* 2016; 35: 697-705.



59. Rastegar-Mojarad M, Ye Z, Wall D, et al. Collecting and Analyzing Patient Experiences of Health Care From Social Media. *JMIR Research Protocols* 2015; 4: e78.
60. Reimann S and Strech D. The representation of patient experience and satisfaction in physician rating sites. A criteria-based analysis of English- and German-language sites. *BMC Health Services Research* 2010; 10: 332.
61. Riemer C, Doctor M and Dellavalle RP. Analysis of online ratings of dermatologists. *JAMA Dermatology* 2016; 152: 218-220.
62. Rothenfluh F, Germeni E and Schulz JP. Consumer Decision-Making Based on Review Websites: Are There Differences Between Choosing a Hotel and Choosing a Physician? *J Med Internet Res* 2016; 18: e129. DOI: 10.2196/jmir.5580.
63. Samora JB, Lifchez SD, Blazar PE, et al. Physician-Rating Web Sites: Ethical Implications. *Journal of Hand Surgery - American Volume* 2016; 41: 104-110.e101.
64. Segal J, Sacopulos M, Sheets V, et al. Online doctor reviews: do they track surgeon volume, a proxy for quality of care? *Journal of Medical Internet Research* 2012; 14: e50. Research Support, Non-U.S. Gov't.
65. Shepherd A, Sanders C, Doyle M, et al. Using social media for support and feedback by mental health service users: thematic analysis of a twitter conversation. *BMC Psychiatry* 2015; 15: 29.
66. Smith RJ and Lipoff JB. Evaluation of Dermatology Practice Online Reviews: Lessons From Qualitative Analysis. *JAMA Dermatology* 2016; 152: 153-157.
67. Sobin L and Goyal P. Trends of online ratings of otolaryngologists: what do your patients really think of you? *JAMA Otolaryngology-- Head & Neck Surgery* 2014; 140: 635-638.
68. Speed E, Davison C and Gunnell C. The anonymity paradox in patient engagement: reputation, risk and web-based public feedback. *Medical Humanities* 2016; 42: 135-140. DOI: 10.1136/medhum-2015-010823.
69. Sundstrom B MS, Anderson M, et al. Voices of the "99 percent": the role of online narrative to improve health care. *Permanente Journal* 2016; 20: 49-55.
70. Terlutter R, Bidmon S and Rottl J. Who uses physician-rating websites? Differences in sociodemographic variables, psychographic variables, and health status of users and nonusers of physician-rating websites. *J Med Internet Res* 2014; 16: e97.
71. Thackeray R, Crookston BT and West JH. Correlates of health-related social media use among adults. *J Med Internet Res* 2013; 15: e21.
72. Timian A, Rupcic S, Kachnowski S, et al. Do patients "like" good care? measuring hospital quality via Facebook. *American Journal of Medical Quality* 2013; 28: 374-382.
73. Trehan SK, DeFrancesco CJ, Nguyen JT, et al. Online Patient Ratings of Hand Surgeons. *Journal of Hand Surgery - American Volume* 2016; 41: 98-103.
74. van de Belt TH, Engelen LJPG, Verhoef LM, et al. Using patient experiences on Dutch social media to supervise health care services: exploratory study. *J Med Internet Res* 2015; 17: e7. Research Support, Non-U.S. Gov't.
75. Wallace BC, Paul MJ, Sarkar U, et al. A large-scale quantitative analysis of latent factors and sentiment in online doctor reviews. *Journal of the American Medical Informatics Association* 2014; 21: 1098-1103.
76. van Velthoven MH, Atherton H and Powell J. A cross sectional survey of the UK public to understand use of online ratings and reviews of health services. *Patient Education and Counseling* 2018; 101: 1690-1696. DOI: <https://doi.org/10.1016/j.pec.2018.04.001>.
77. Yaraghi N, Wang W, Gao G, et al. How Online Quality Ratings Influence Patients' Choice of Medical Providers: Controlled Experimental Survey Study. *J Med Internet Res* 2018; 20: e99. Original Paper 26.03.2018. DOI: 10.2196/jmir.8986.
78. Zhang W, Deng Z, Hong Z, et al. Unhappy Patients Are Not Alike: Content Analysis of the Negative Comments from China's Good Doctor Website. *J Med Internet Res* 2018; 20: e35. Original Paper 25.01.2018. DOI: 10.2196/jmir.8223.
